# Supplementary material for: Use of Electronic Health Information Technology in a National Sample of Hospitals That Provide Specialty Substance Use Care
Source: Atypon-hosted journal article supplement (doi:10.1176/appi.ps.202000816), 2021-04-15

Differences in facility characteristics between the analytic sample and hospitals missing the outcomes of electronic health record and health information exchange among hospital-based 2017 N-SSATS addiction programs.

| <b>Electronic Health Records</b>                  |                                      |          |                              |          |          |          |  |
|---------------------------------------------------|--------------------------------------|----------|------------------------------|----------|----------|----------|--|
|                                                   | <b>Analytic Sample<br/>(N = 894)</b> |          | <b>Missing<br/>(N = 130)</b> |          | $\chi^2$ | <i>p</i> |  |
|                                                   | <b>N</b>                             | <b>%</b> | <b>N</b>                     | <b>%</b> |          |          |  |
| <b>Facility Type</b>                              |                                      |          |                              |          |          |          |  |
| Psychiatric hospital                              | 268                                  | 30.0     | 16                           | 12.3     | 17.7     | <0.001   |  |
| General hospital                                  | 589                                  | 65.9     | 98                           | 75.4     | 4.6      | 0.03     |  |
| Other hospital                                    | 37                                   | 4.1      | 16                           | 12.3     | 15.4     | <0.001   |  |
| <b>Ownership</b>                                  |                                      |          |                              |          |          |          |  |
| For-profit                                        | 196                                  | 21.9     | 17                           | 13.1     | 5.4      | 0.02     |  |
| Nonprofit                                         | 576                                  | 64.4     | 96                           | 73.9     | 4.5      | 0.04     |  |
| Government <sup>a</sup>                           | 122                                  | 13.7     | 17                           | 13.1     | 0.0      | 0.86     |  |
| <b>Accepts Medicaid<sup>b</sup></b>               | 726                                  | 81.9     | 92                           | 71.9     | 7.3      | 0.01     |  |
| <b>Provides addiction Medications<sup>c</sup></b> | 729                                  | 81.5     | 36                           | 27.7     | 174.2    | <0.001   |  |
| <b>Outpatient Services</b>                        |                                      |          |                              |          |          |          |  |
| Inpatient                                         | 420                                  | 47.0     | 14                           | 10.8     | 60.9     | <0.001   |  |
| Residential                                       | 51                                   | 5.7      | 17                           | 13.1     | 10.0     | <0.001   |  |
| Intensive/partial outpatient                      | 280                                  | 31.3     | 77                           | 59.2     | 38.9     | <0.001   |  |
| Regular outpatient                                | 143                                  | 16.0     | 22                           | 16.9     | 0.1      | 0.79     |  |
| <b>Health Information Exchange</b>                |                                      |          |                              |          |          |          |  |
|                                                   | <b>Analytic Sample<br/>(N = 839)</b> |          | <b>Missing<br/>(N = 185)</b> |          | $\chi^2$ | <i>p</i> |  |
|                                                   | <b>N</b>                             | <b>%</b> | <b>N</b>                     | <b>%</b> |          |          |  |
| <b>NSSATs items</b>                               |                                      |          |                              |          |          |          |  |
| <b>Facility Type</b>                              |                                      |          |                              |          |          |          |  |
| Psychiatric hospital                              | 227                                  | 27.1     | 57                           | 30.8     | 1.1      | 0.30     |  |
| General hospital                                  | 563                                  | 67.1     | 124                          | 67.0     | 0.0      | 0.98     |  |
| Other hospital                                    | 49                                   | 5.8      | 4                            | 2.2      | 4.2      | 0.04     |  |
| <b>Ownership</b>                                  |                                      |          |                              |          |          |          |  |
| For-profit                                        | 174                                  | 20.1     | 39                           | 21.1     | 0.0      | 0.92     |  |
| Nonprofit                                         | 543                                  | 64.7     | 129                          | 69.7     | 1.7      | 0.19     |  |
| Government <sup>a</sup>                           | 122                                  | 14.5     | 17                           | 9.2      | 3.7      | 0.05     |  |
| <b>Accepts Medicaid<sup>b</sup></b>               | 674                                  | 81.0     | 144                          | 79.1     | 0.3      | 0.56     |  |
| <b>Provides addiction Medications<sup>c</sup></b> | 631                                  | 75.2     | 134                          | 72.4     | 0.62     | 0.43     |  |
| <b>Outpatient Services</b>                        |                                      |          |                              |          |          |          |  |
| Inpatient                                         | 351                                  | 41.8     | 83                           | 44.9     | 0.6      | 0.45     |  |
| Residential                                       | 56                                   | 6.7      | 12                           | 6.5      | 0.0      | 0.93     |  |
| Intensive/partial outpatient                      | 294                                  | 35.0     | 63                           | 34.1     | 0.1      | 0.80     |  |
| Regular outpatient                                | 138                                  | 16.5     | 27                           | 14.6     | 0.4      | 0.54     |  |

<sup>a</sup>Includes: state, local/county/community, tribal, or federal government. There were no Veterans Affairs hospitals in sample.

<sup>b</sup>Medicaid payment has 10 missing; therefore, these 10 are missing from the denominator in the percentages shown.

<sup>c</sup>Includes medications for alcohol or opioid use disorder (naltrexone, buprenorphine, methadone, acamprosate, or disulfiram).

Consort diagram explaining patterns of missingness

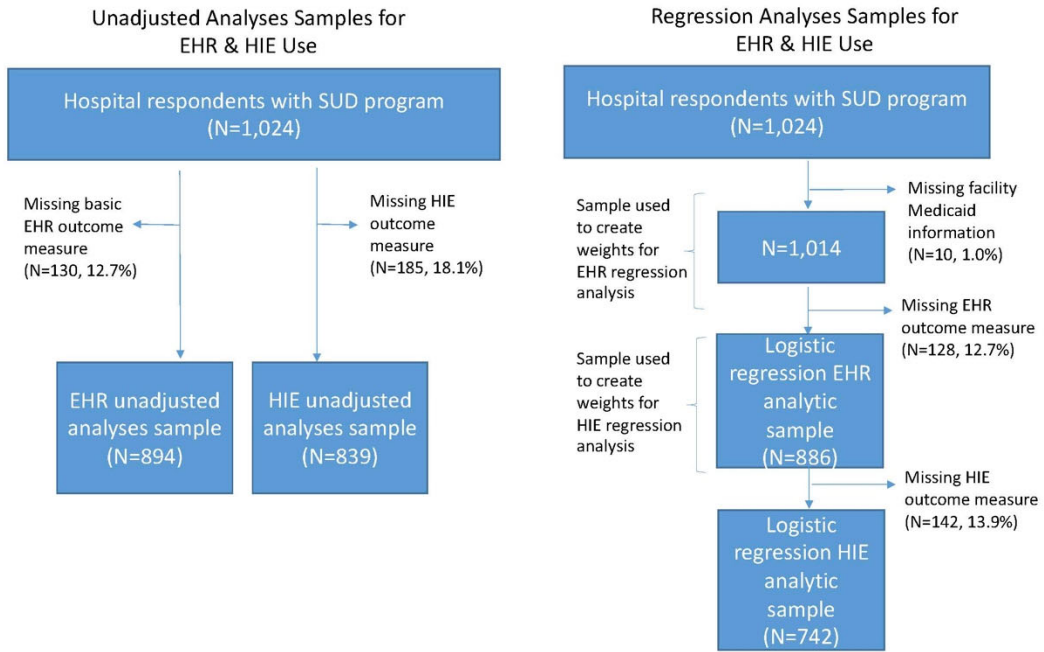

Supplement: appi.ps.202000816.ds001.pdf [file appi.ps.202000816.ds001.pdf]
